# Supplementary material for: Characteristics and process controls of statistical flood moments in Europe – a data-based analysis
Source: Copernicus journal article supplement (doi:10.5194/hess-25-5535-2021), 2021-10-22
Supplement: Supplementary file 1 [file hess-25-5535-2021-supplement.pdf]

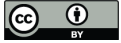

*Supplement of*

## **Characteristics and process controls of statistical flood moments in Europe – a data-based analysis**

**David Lun et al.**

*Correspondence to:* David Lun (lun@hydro.tuwien.ac.at)

The copyright of individual parts of the supplement might differ from the article licence.

## MAF

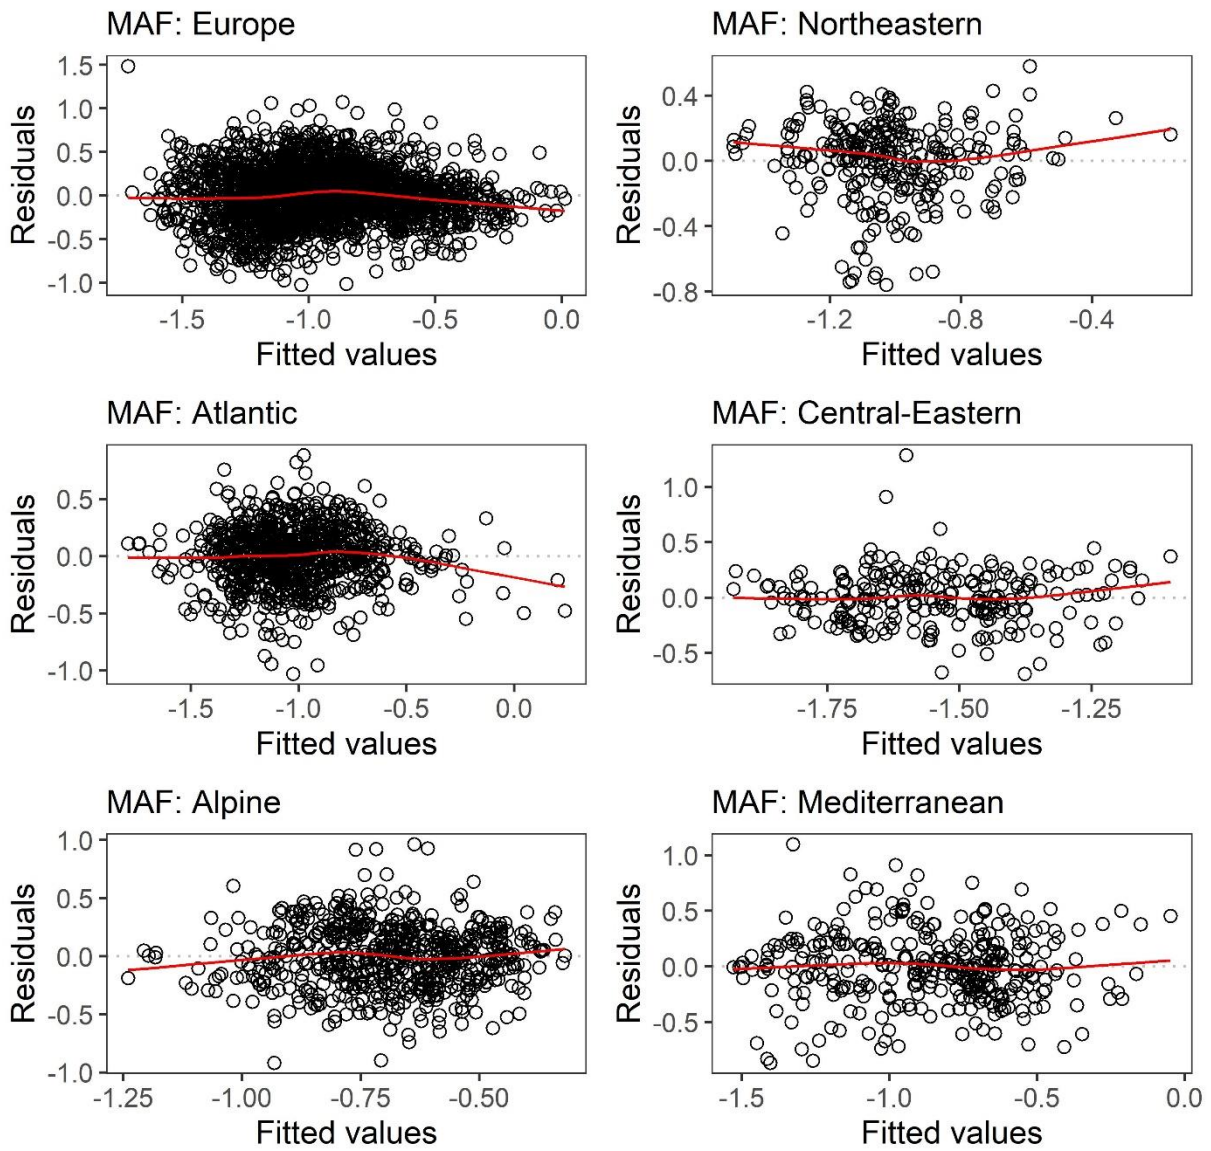

Figure S1: Scatter plots of fitted values and residuals of regional regression models for MAF. Red lines are drawn via LOWESS smoothing.

CV

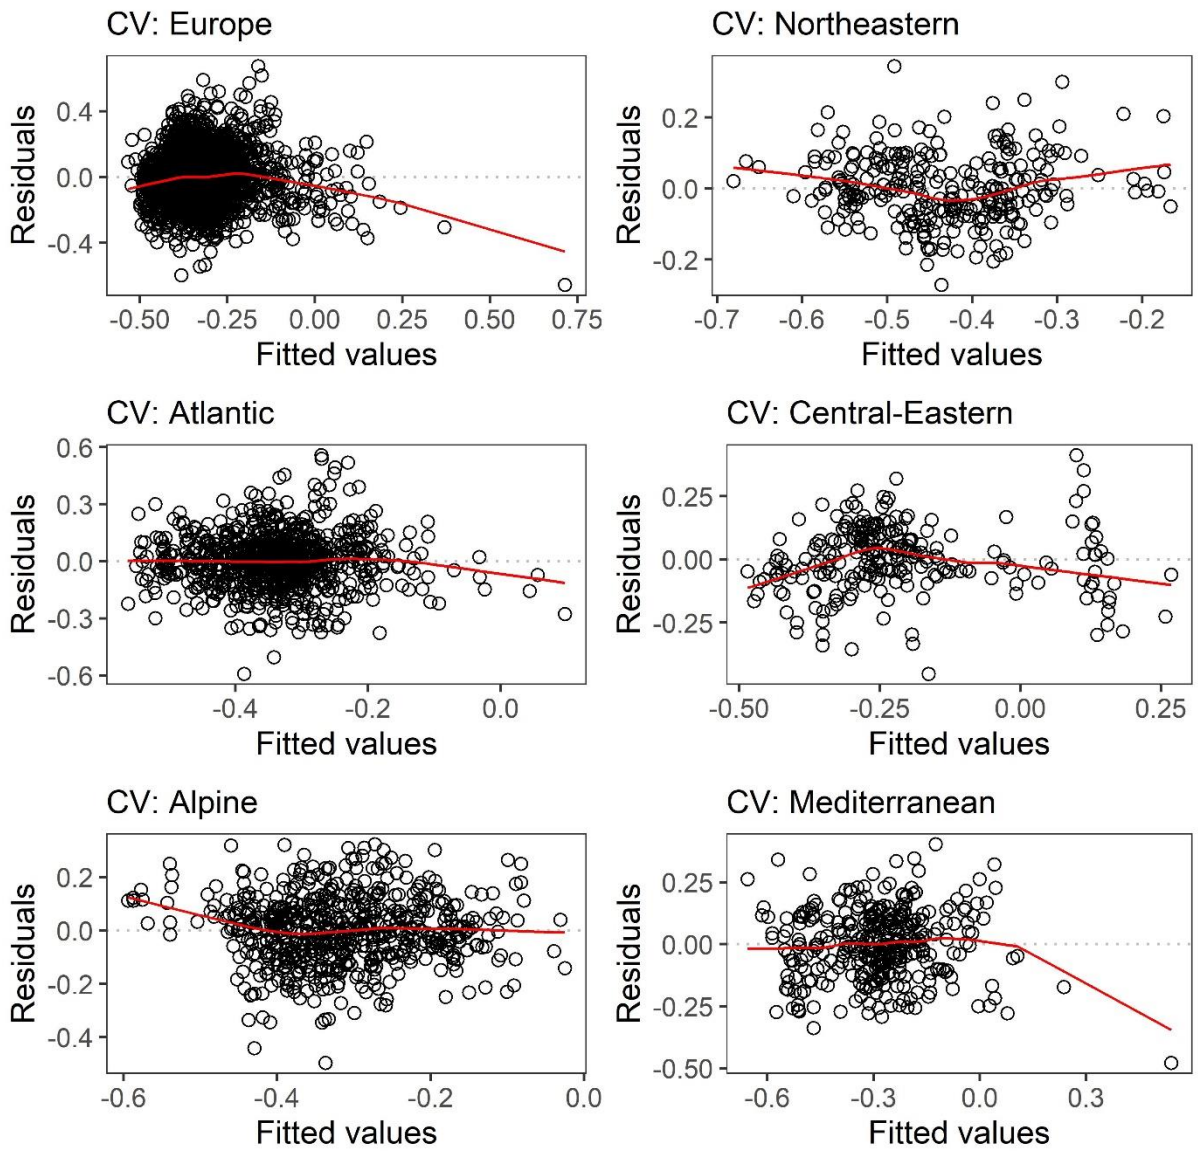

Figure S2: Scatter plots of fitted values and residuals of regional regression models for CV. Red lines are drawn via LOWESS smoothing.

MAF

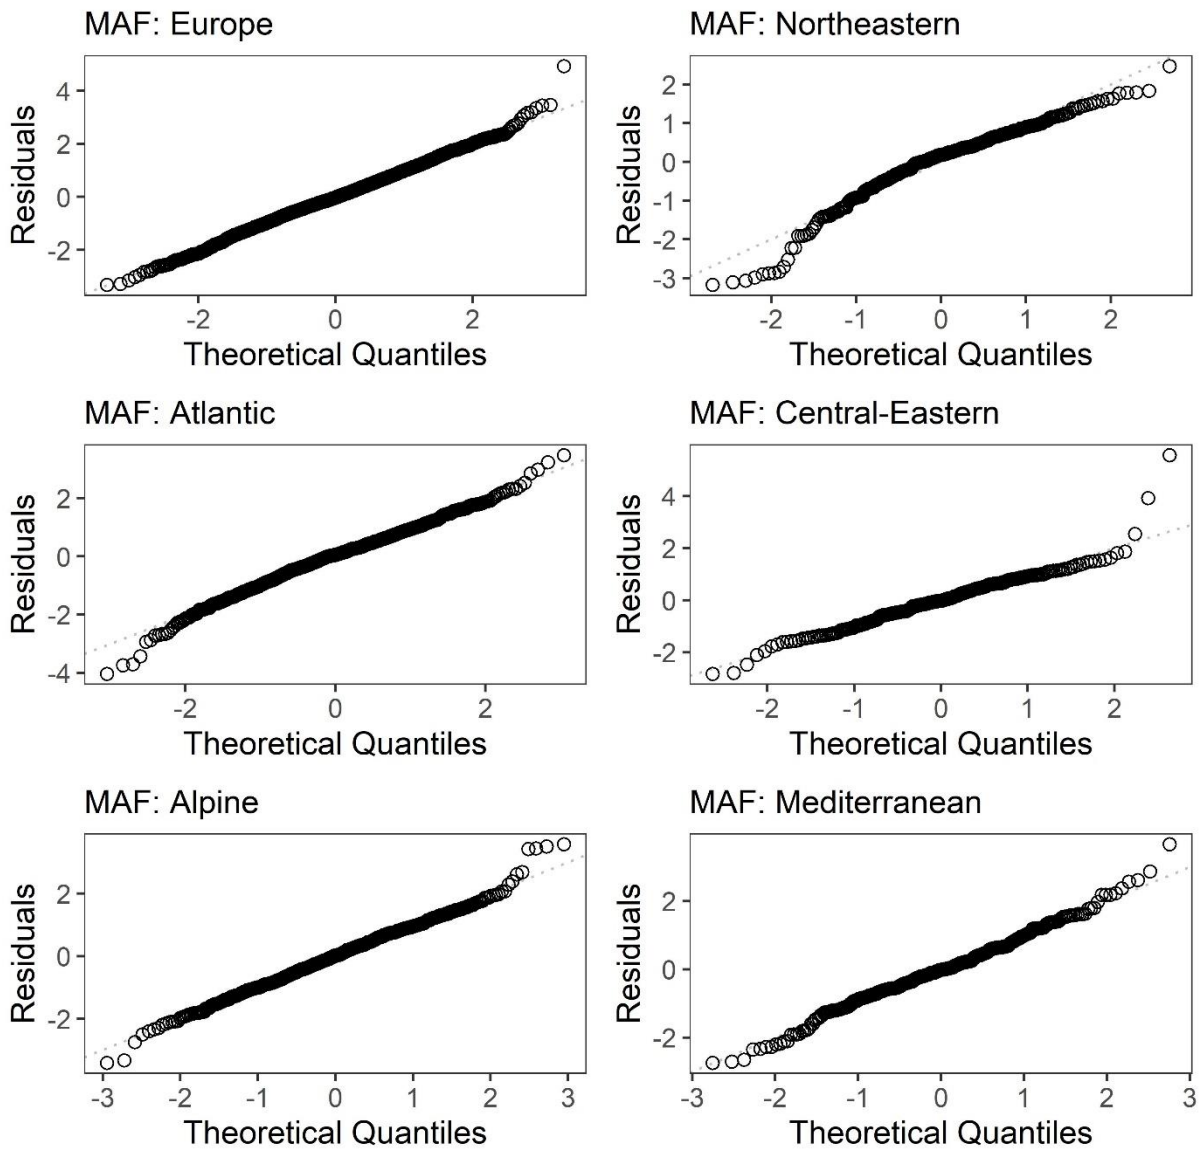

Figure S3: Q-Q plot of standardized residuals of regional regression models for MAF.

CV

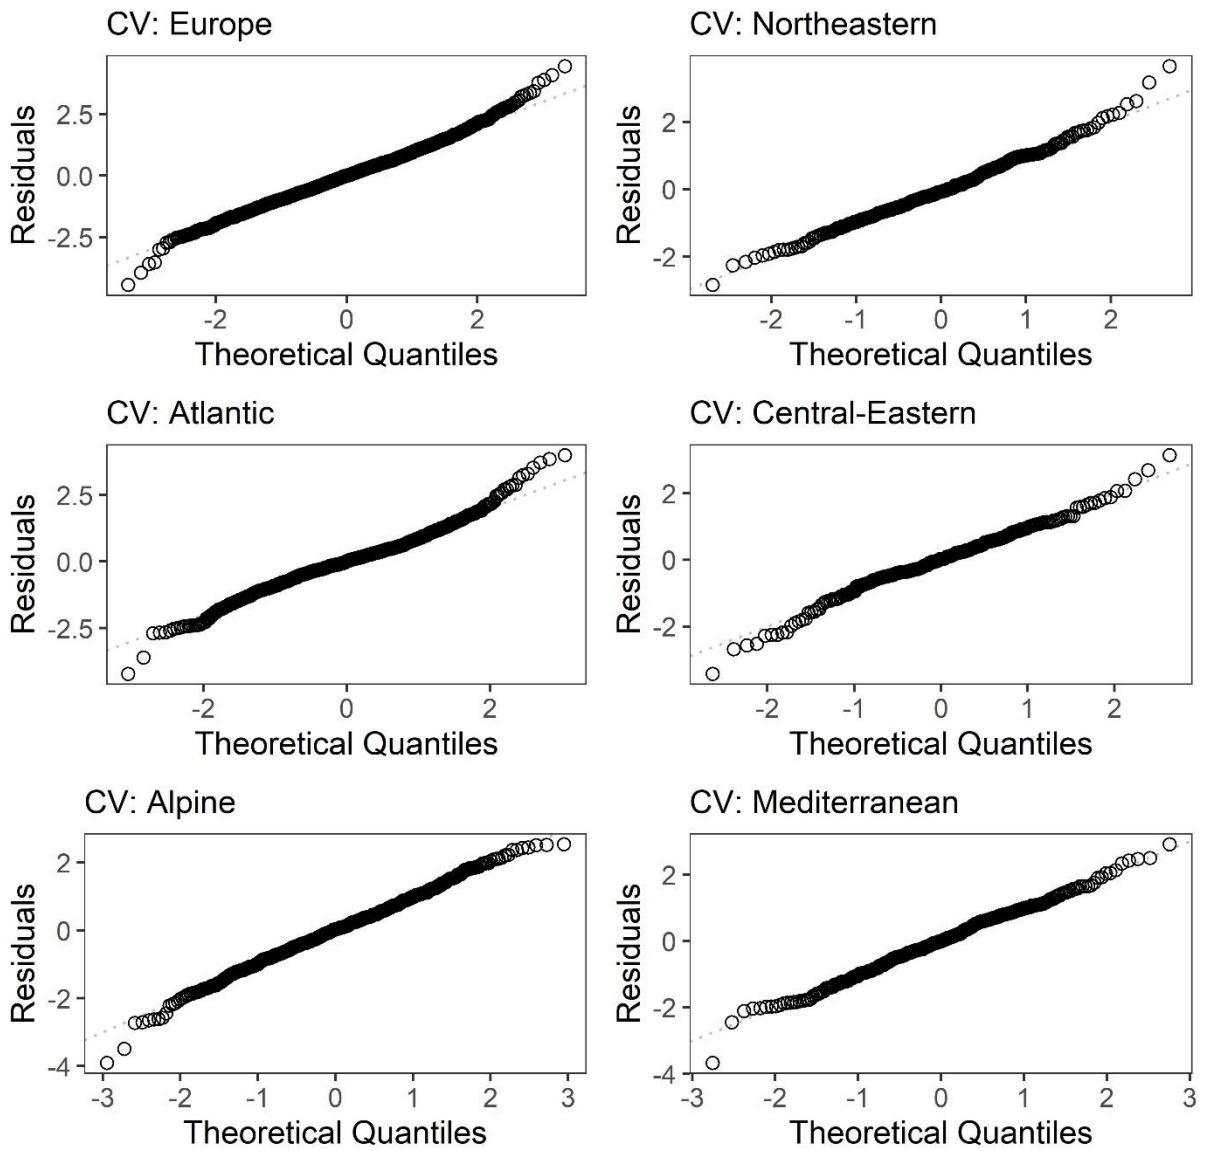

Figure S4: Q-Q plot of standardized residuals of regional regression models for CV.

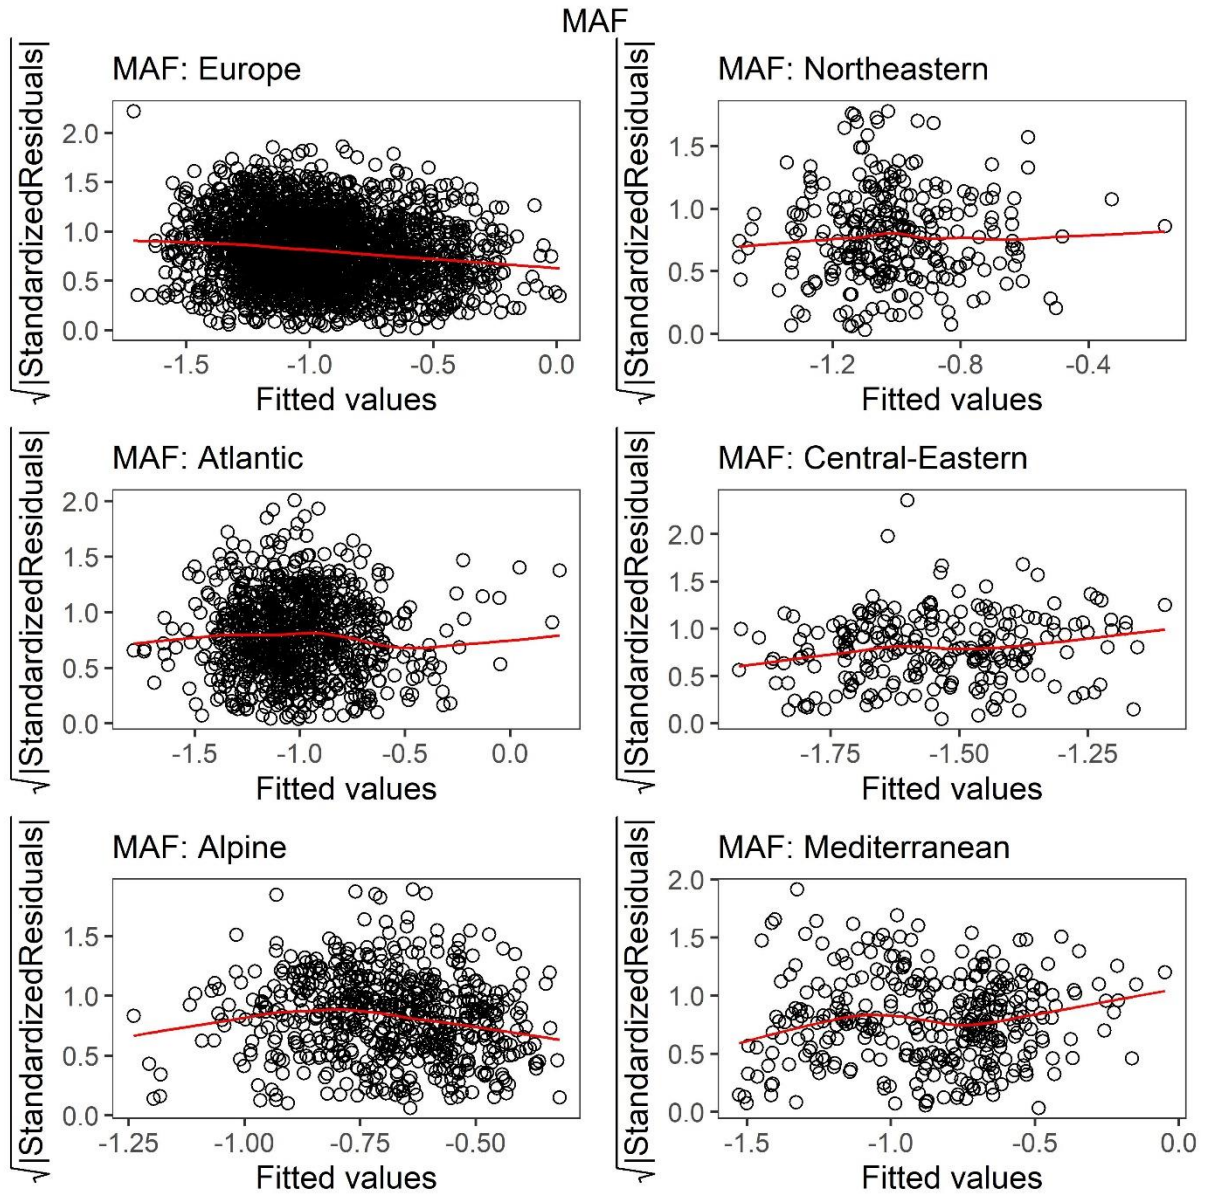

Figure S5: Scatter plots of fitted values and square root of absolute value of standardized residuals of regional regression models for MAF. Red lines are drawn via LOWESS smoothing.

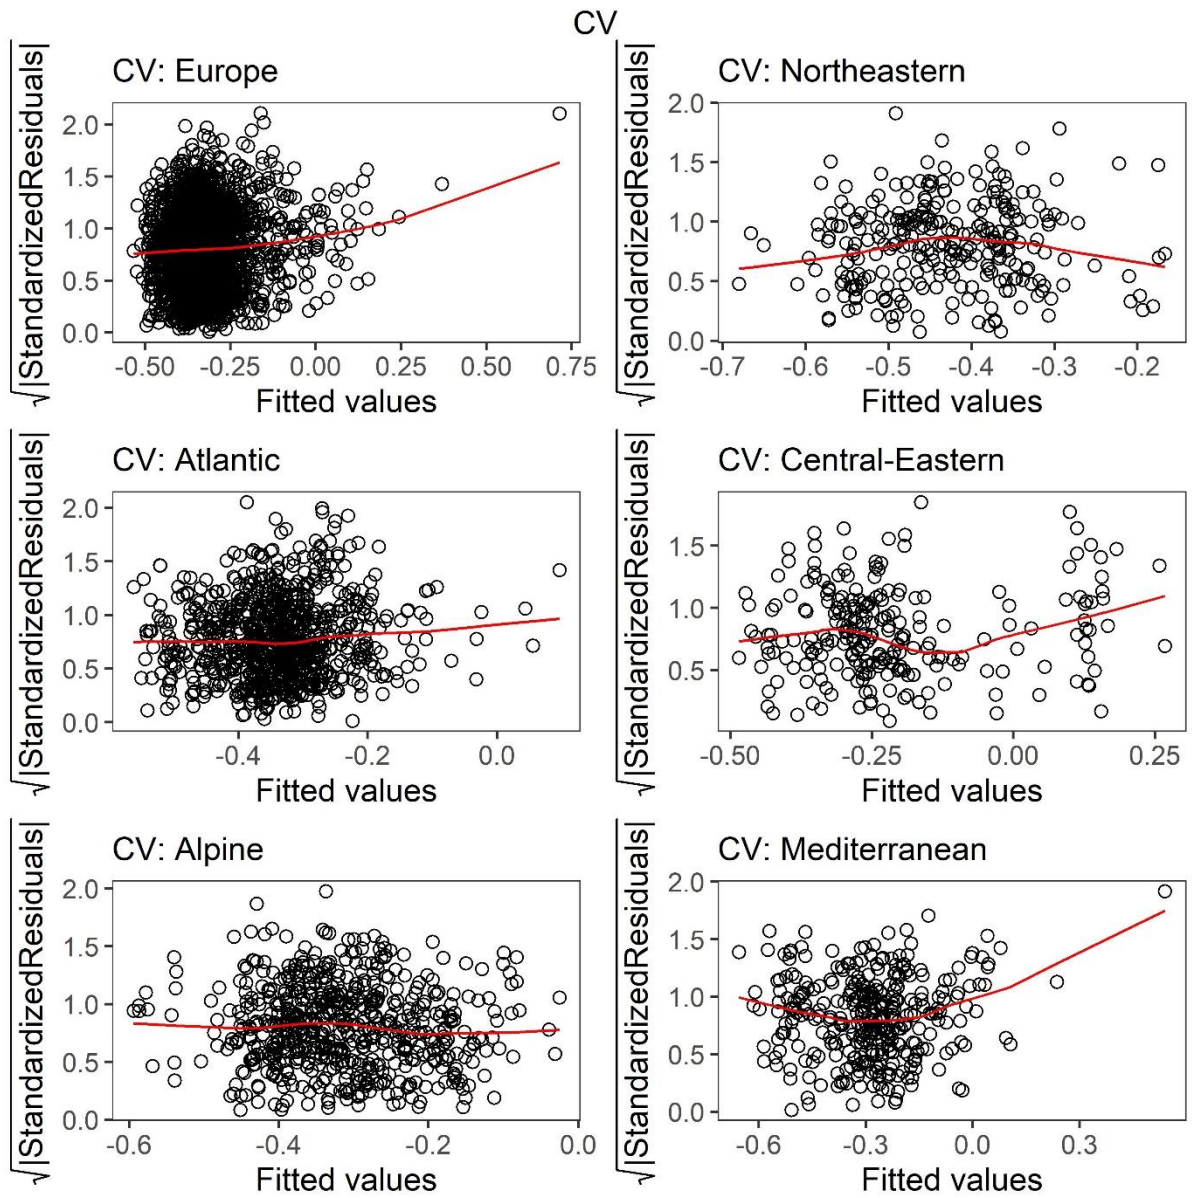

Figure S6: Scatter plots of fitted values and square root of absolute value of standardized residuals of regional regression models for CV. Red lines are drawn via LOWESS smoothing.

Table S1: Row-indices of omitted catchments for regional regression models. The row-indices refer to the supplementary material of Blöschl, Hall et al. (2019). Only catchments that were used in their Figure 1 are used in this paper.

---

|      |
|------|
| 221  |
| 320  |
| 415  |
| 416  |
| 566  |
| 601  |
| 630  |
| 632  |
| 969  |
| 2154 |
| 2232 |
| 3382 |
| 3456 |
| 3467 |
| 3468 |
| 3511 |
| 3570 |
| 3593 |
| 3610 |
| 3620 |
| 3640 |
| 3679 |

---
